# Supplementary material for: Description of Two Cases of Anaplastic Large Cell Lymphoma Associated with a Breast Implant
Source: Hindawi journal article supplement (doi:10.1155/2019/6137198), 2019-06-27

**Supplementary figure: CD30 immunocytochemistry is negative in the lining (original magnification 50X).**

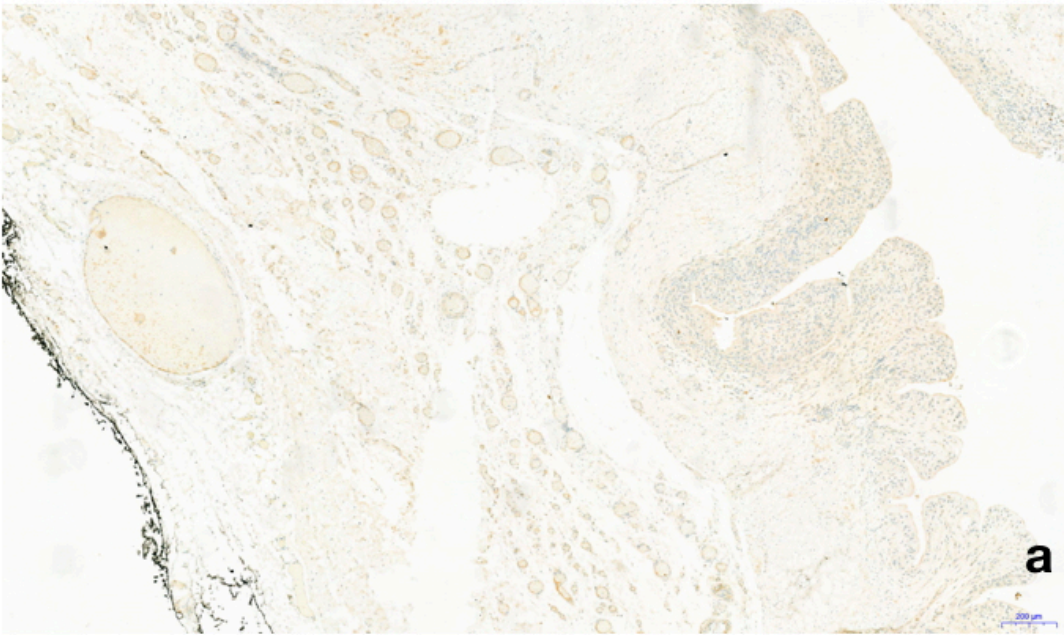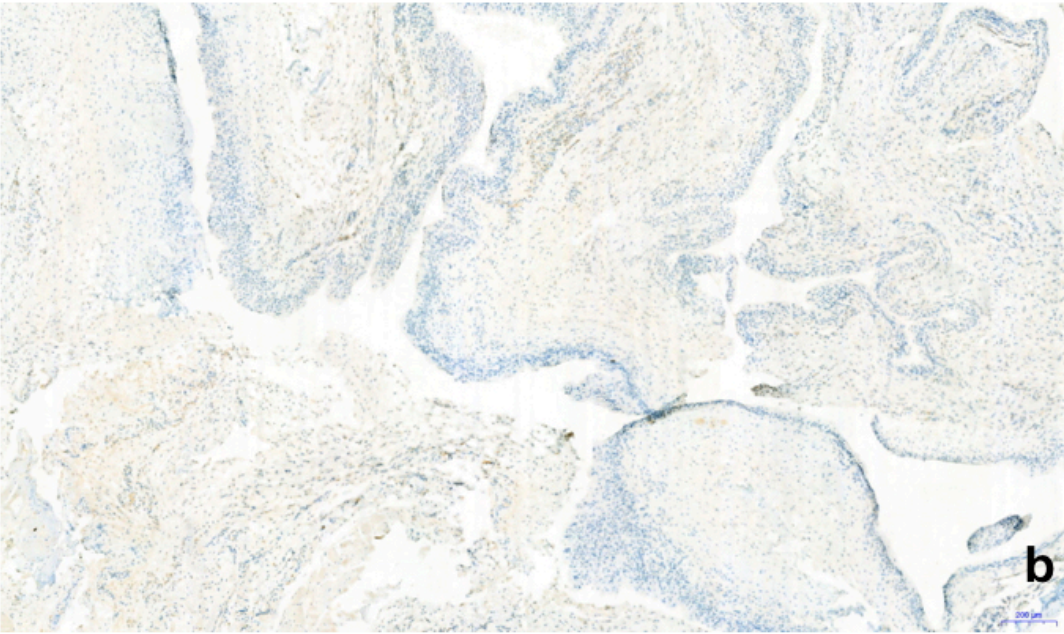

Supplement: f1 [file 6137198.f1.pdf]
